# Supplementary material
Source: publisher figshare collection journal article supplement (https://acs.figshare.com/ndownloader/files/13197338)

**Supporting Figure S2.** Annotated spectra of the peptides matching to METTL12 identified in U2-OS cells and corresponding spectra downloaded from the SRMatlas database.

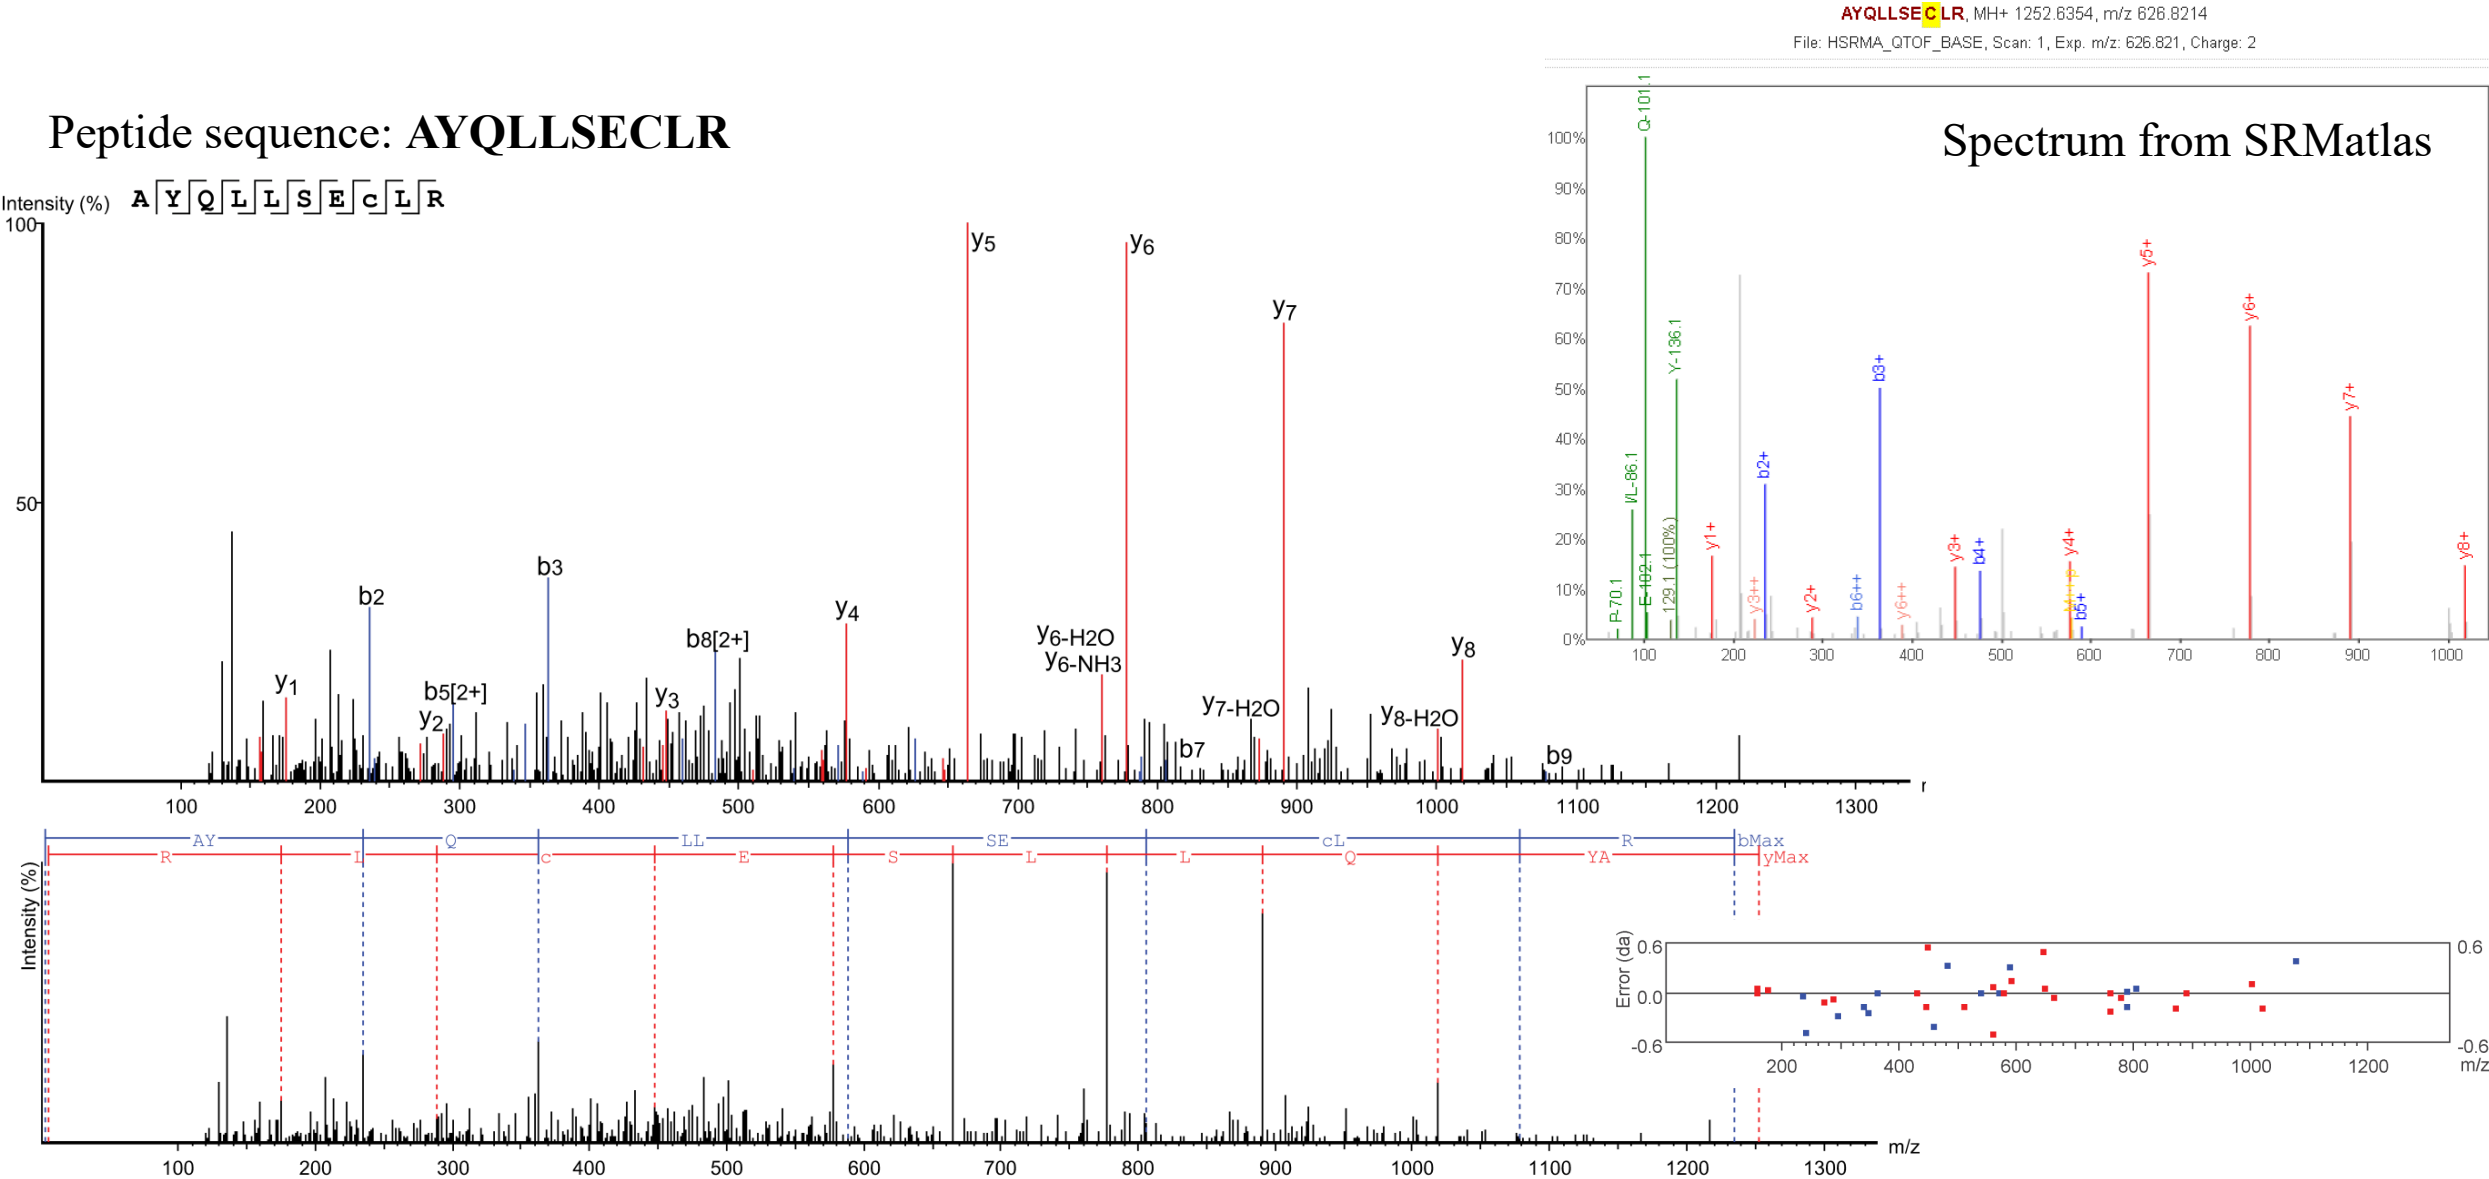

Spectrum from SRMatlas

GITYFAYLIQGSH, MH+ 1469.7423, m/z 735.3748

File: HSRMA\_QTOF\_BASE, Scan: 1, Exp. m/z: 735.375, Charge: 2

Peptide sequence: GITYFAYLIQGSH

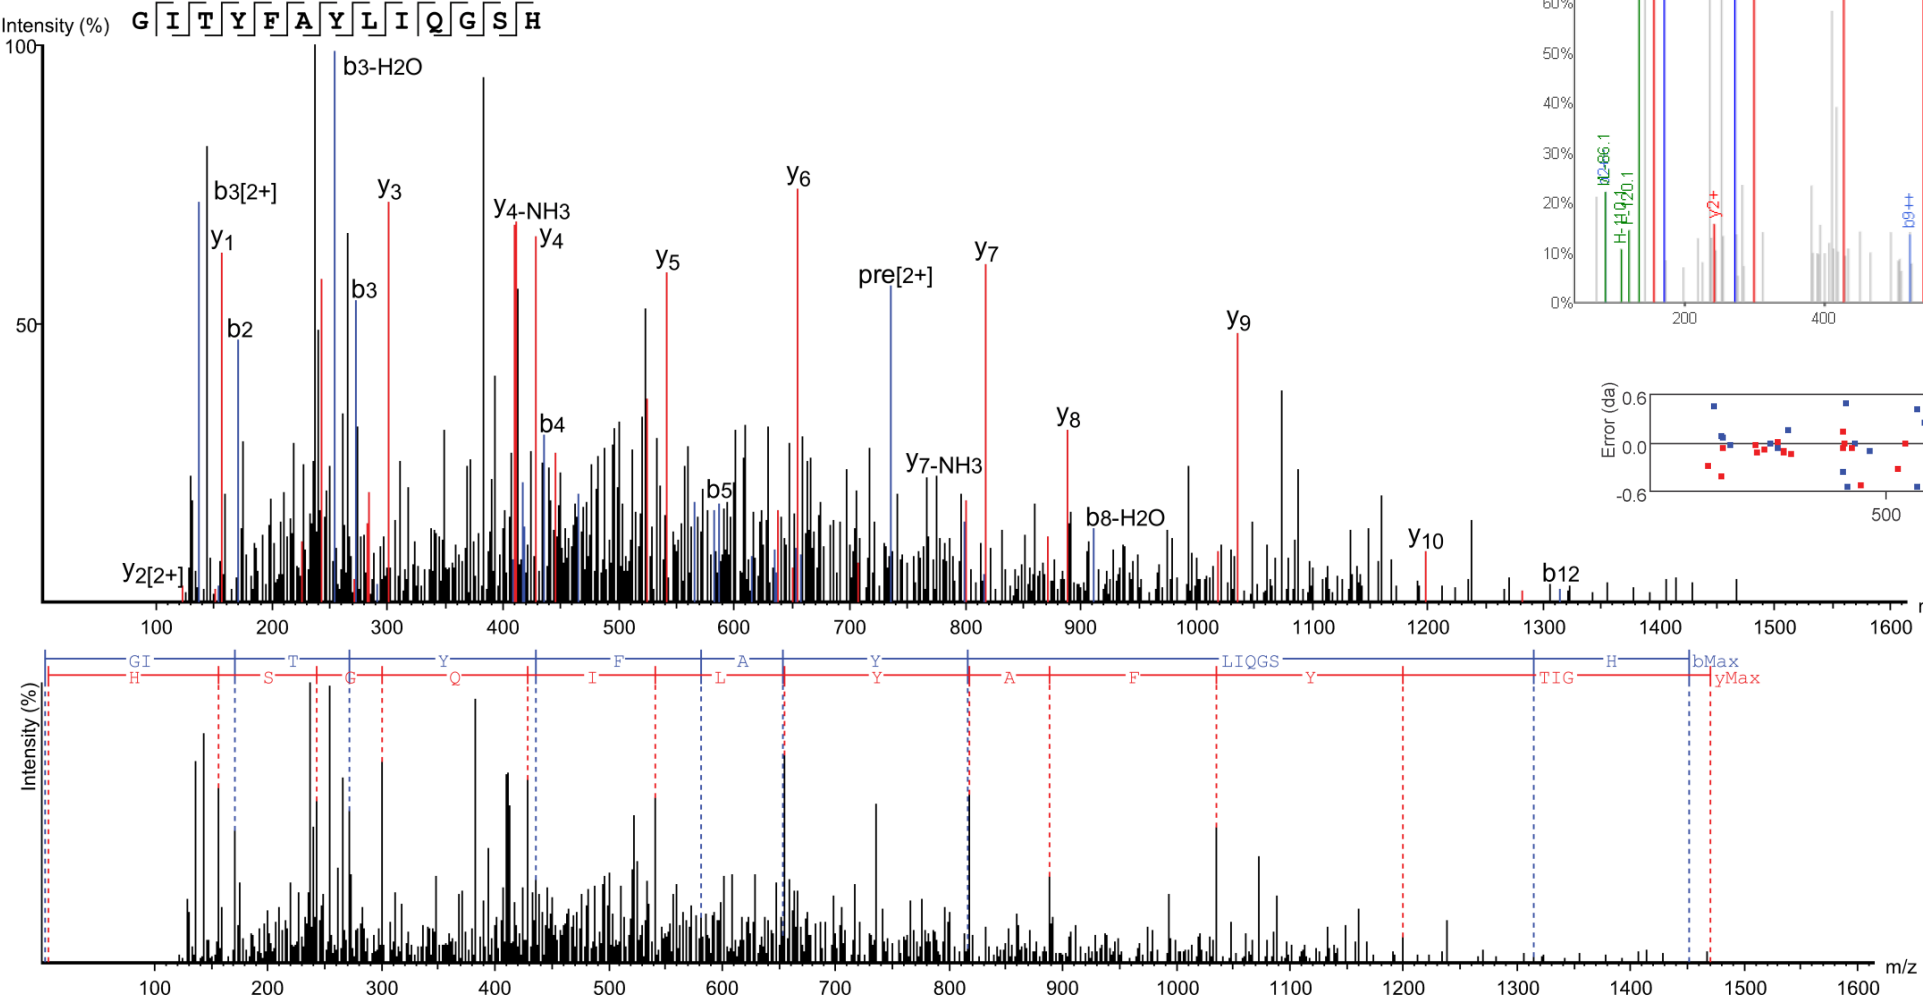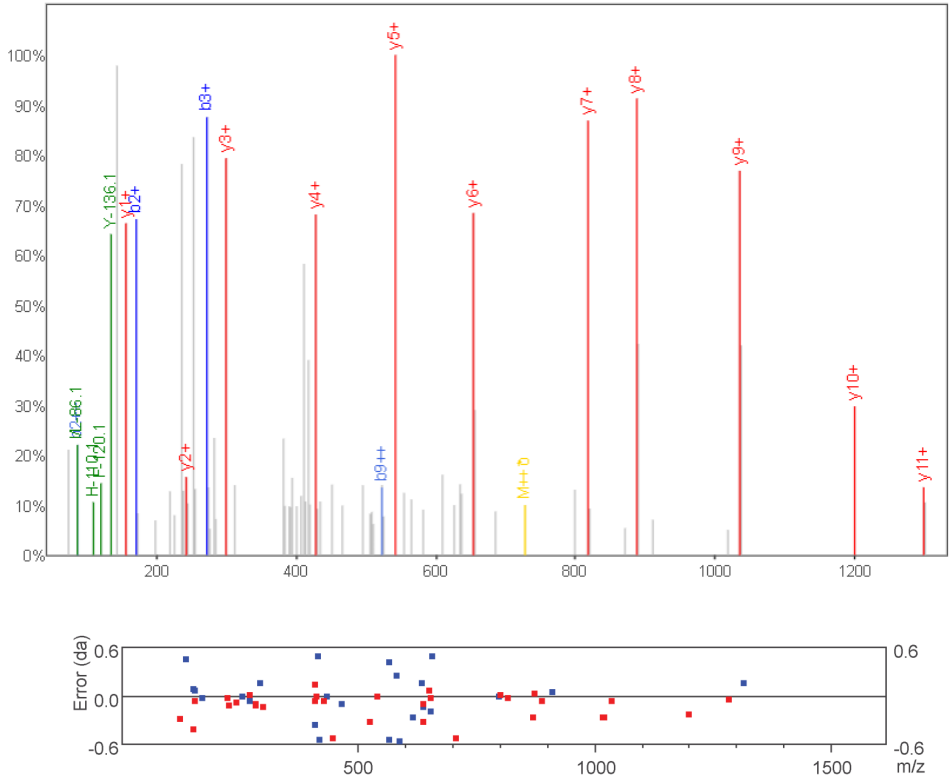

VLNPQGTLIQFSDEDPDVR, MH+ 2143.0666, m/z 1072.0369

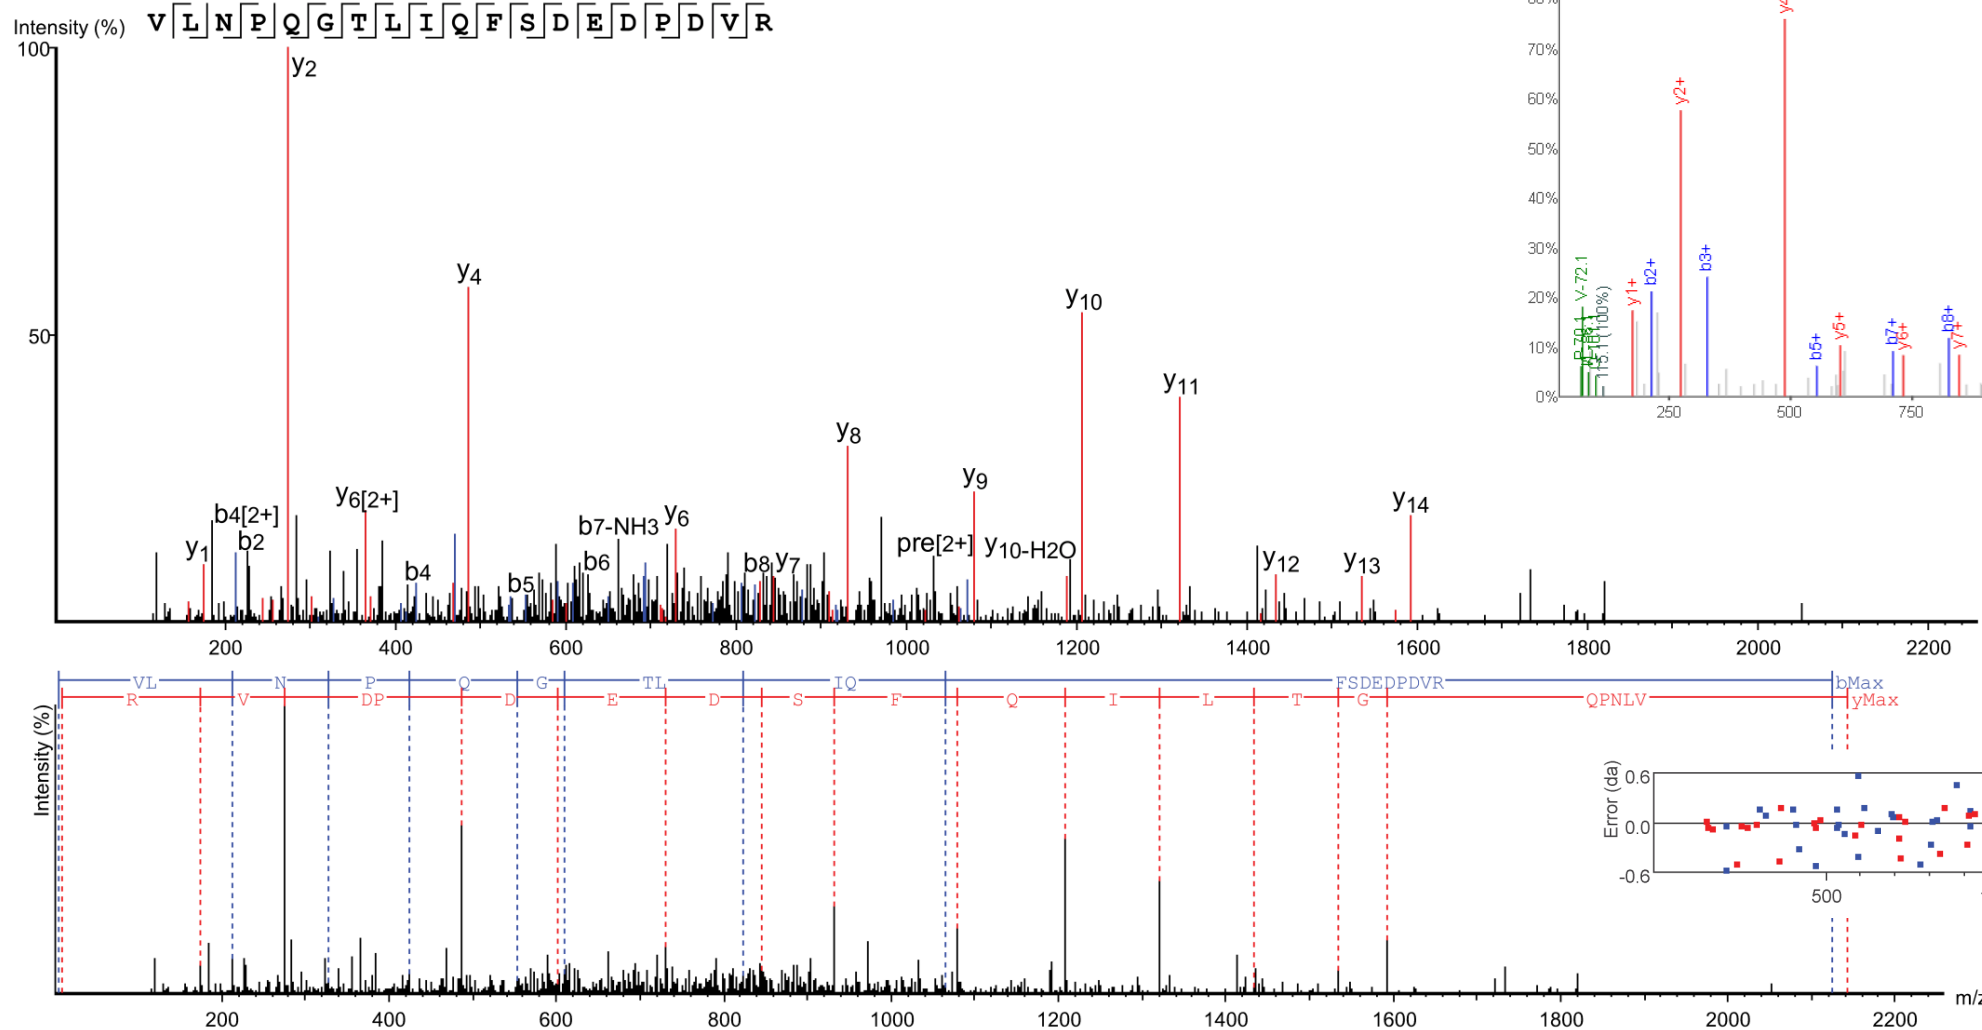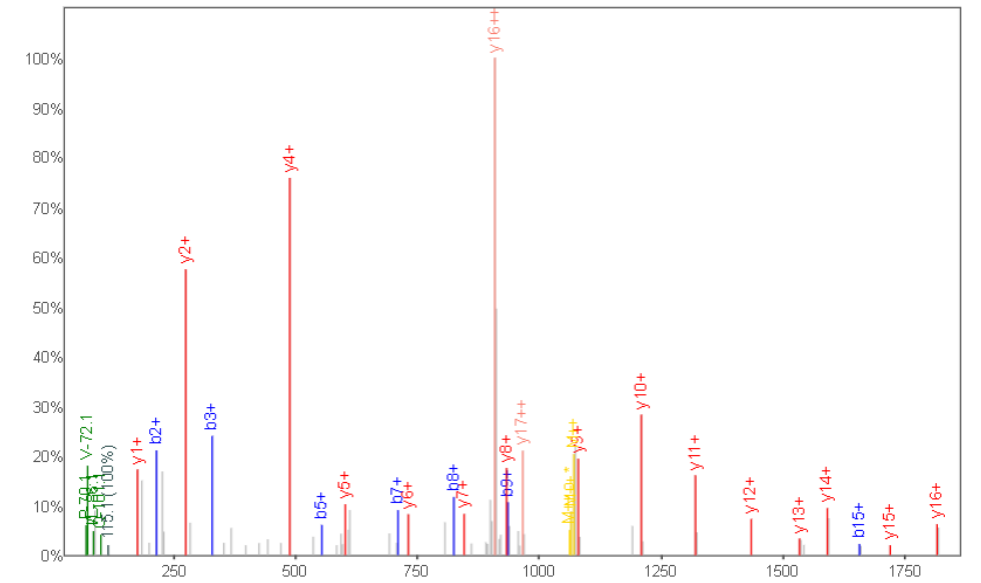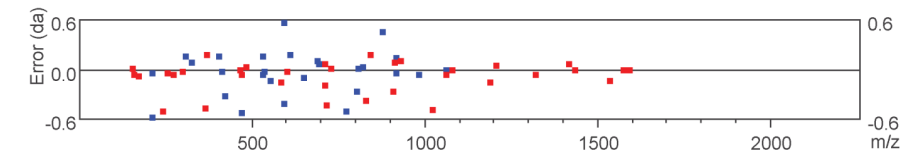

Supplement: Supplementary file 1 [file 13197338]
